# Supplementary material for: Bmi1 expression in long-term germ stem cells
Source: PubMed Central journal article supplement — Sci Rep. 2014 Aug 22;4:6175. doi: 10.1038/srep06175 (PMC4141270; doi:10.1038/srep06175), 2014-08-22

## **Bmi1 expression in long-term germ stem cells**

<sup>1,2</sup>Yoshihiro Komai, <sup>1,3</sup>Toshihiro Tanaka, <sup>1</sup>Yoko Tokuyama, <sup>1,5</sup>Hirotsugu Yanai,  
<sup>1,6</sup>Shuichi Ohe, <sup>1,7</sup>Taichi Omachi, <sup>1</sup>Naho Atsumi, <sup>1</sup>Naoko Yoshida, <sup>1</sup>Keiki, Kumano,  
<sup>1</sup>Hiroko Hisha, <sup>2</sup>Tadashi Matsuda and <sup>1</sup>Hiroo Ueno\*

<sup>1</sup>Department of Stem Cell Pathology, <sup>2</sup>Department of Urology and Andrology, <sup>3</sup>Third  
Department of Internal Medicine, <sup>5</sup>Department of Surgery and <sup>6</sup>Department of  
Dermatology, <sup>7</sup>Department of Pediatrics, Kansai Medical University, 2-5-1 Shin-machi,  
Osaka 573-1010, Japan

\*Correspondence and requests for materials should be addressed to H.U.  
([hueno@hirakata.kmu.ac.jp](mailto:hueno@hirakata.kmu.ac.jp)).

## Supplementary Figure Legends

**Figure S1. Detection of  $Bmi1^{High}$ -derived and PLZF-positive  $A_{paired}$  cells in cross sections of seminiferous tubules obtained from  $Bmi1^{creER+}/Rosa26^{Rbw+}$  mice 7 days after tamoxifen labeling.**

The cross sections of seminiferous tubules were stained with anti-PLZF antibody followed by Alexa Fluor 750-labeled secondary antibody. Many PLZF-positive cells (purple) were observed and  $Bmi1^{High}$ -derived and PLZF-positive  $A_{paired}$  cells were detected. White windows at the right upper corner; magnified pictures of rectangle areas (dotted line). Red arrowheads indicate  $Bmi1^{High}$ -derived and PLZF-positive  $A_{paired}$  cells. Scale bar = 100 $\mu$ m.

**Figure S2. A representative littermates produced by mating B6 mice (female) and  $Bmi1^{creER+}/Rosa26^{Rbw+}$  mice (male) 10 weeks after tamoxifen administration.**

Four fluorescent blue color-stained (indicated by red arrowheads), three fluorescent green color-stained (green arrowheads) and one nonfluorescent (white arrow head) pups are seen.

**Figure S3. Tamoxifen does not significantly increase apoptotic germ cells at the dose we used in this study.**

(a) B6 mice were injected with tamoxifen and the testes were collected from the mice 12 or 24 hours later. Cross sections of seminiferous tubules from the mice were stained with TUNEL method. A small number of brown-colored nucleuses were detected. Scale bar = 100 $\mu$ m. (b) Percentages of tubules containing TUNEL-positive cells. NS: not

significant.

**Figure S4. Comparison of expression of GSC markers in  $Bmi1^{High}$ -positive and  $Bmi1^{Low}$ -positive cell populations in  $Bmi1^{GFP/+}$  mice without tamoxifen administration.**

Male germ cells obtained from  $Bmi1^{GFP/+}$  mice were double-stained with anti-MCAM and c-Kit monoclonal antibodies. (a) SSC/FSC profile of the stained cells. (b) MCAM and c-Kit expression on the P1 gated population of the SSC/FSC profile (a). (c) GFP ( $Bmi1$ ) expression on the P2 gated population (MCAM-positive and C-Kit-negative cells) of (b). (d) GFP ( $Bmi1$ ) expression on the P3 gated population (MCAM- and C-Kit-double positive cells) of (b). (e) GFP ( $Bmi1$ ) expression on the P2+P3+P4 gated populations of (b). (f) Relative gene expression levels in  $Bmi1^{High}$ -positive cells and  $Bmi1^{Low}$ -positive cells. From the P2+P3+P4 gated populations (e), 1000  $GFP^{High}$  ( $Bmi1^{High}$ )-positive or  $GFP^{Low}$  ( $Bmi1^{Low}$ )-positive cells were sorted and their mRNA was extracted. cDNA was synthesized from the mRNA and quantitative real-time PCR reactions were performed using various primers such as  $GFR\alpha1$ ,  $ID4$ ,  $Nanos2$ ,  $Ngn3$  and c-Kit. Primers are listed in Table S1. Average of 3 independent experiments. \*:  $P < 0.05$ .

**Figure S5. Representative serial cross sections of seminiferous tubes obtained from  $Bmi1^{creER+}/Rosa26^{Rbw/+}$  mice 2 days after tamoxifen labeling.**

(a) One  $A_{single}$  cell and (b) one  $A_{paired}$  cell can be defined by serial cross-sections. Thickness of each cross section was 5  $\mu m$ , and the sections were cut along long axis.

White windows at the right upper corner; magnified pictures of rectangle areas (dotted line), in which merged images with Hoechst 33342 counter staining (white) are shown. Red arrowheads indicate  $Bmi1^{High}$ -derived cells. Scale bar = 100 $\mu$ m. \*: Higher magnification of the photographs revealed that small red dots were not cells, but non-specific artifacts.

**Figure S6. Increase in the number of patches derived from  $Bmi1^{High}$ -positive cells by busulfan induced injury.**

(a) Fluorescence image of seminiferous tubes obtained from  $Bmi1^{creER/+}/Rosa26^{Rbw/+}$  mice injected with busulfan.  $Bmi1^{creER/+}/Rosa26^{Rbw/+}$  mice that had received tamoxifen 2 days before were administered a single dose of busulfan. Twelve weeks later, the testes of the mice were removed and the number of patches was counted. Scale bars = 5 mm in upper panel, 2 mm in middle panel. (b) The injections of busulfan significantly unregulated the number of patches compared with that of untreated mice.  $P < 0.01$  by unpaired Student's t-test. w; weeks.

**Figure S7. Relationship between “delayed” and “actual” seminiferous stages.**

Because of 2-day-delay between tamoxifen injection and analyses of labeled cells, the stage in which original  $Bmi1^{High}$ -positive cells exist should be back-calculated from the stage in which  $Bmi1^{High}$ -derived cells were observed.

**Figure S8. Relationship between  $GFR\alpha 1$ -positive  $A_{single}$  cells and their seminiferous stages.**

(a and b) (left)  $GFR\alpha 1$ -positive (red) cells (right) Hoechst 33342 counter staining

(white) (c) PAS-Hematoxylin staining of continuous specimen to (a). Upper right panel was the magnified images of white square. (d) PAS-Hematoxylin staining of continuous specimen to (b). Lower right panel was the magnified images of white square. Arrow heads: GFR $\alpha$ 1-positive A<sub>single</sub> cells. Roman numbers indicate seminiferous epithelial stages (actual stages). Scale bars = 100  $\mu$ m

### Supplemental movie

Serial images spanning 100  $\mu$ m of seminiferous tubules in the testis from *Bmi1<sup>creER/+</sup>/Rosa26<sup>Rbw/+</sup>* mice 12 weeks after tamoxifen induction. Hoechst 33342 counter staining is shown in light blue color.

### Supplemental Tables

**Table S1, List of primers**

| Gene   | Forward               | Reverse                    |
|--------|-----------------------|----------------------------|
| Gapdh  | AAGGGCTCATGACCACAGTC  | ACACATTGGGGGTAGGAACA       |
| Bmi1   | AAACCAGACCACTCCTGAACA | TCTTCTTCTCTTCATCTCATTTTTGA |
| Gfra1  | AGAAGCAGTTTCACCCAG    | ATCATCACCACCACCATC         |
| ID4    | TGAACAAGCAGGGTGACAG   | CGGTGGCTTGTTTCTCTTAATTC    |
| Nanos2 | GACCAGGCTCATACTCAAG   | GGAGGGTGTGGGTTGTG          |
| Ngn3   | GTCGGGAGAACTAGGATGGC  | GGAGCAGTCCCTAGGTATG        |
| c-Kit  | ACATCGCCAGAGCCAACG    | ATCCACTTTAATTCGGGTCAA      |

**Table S2 . Summary of stage mismatches**

| The example number #                            | 1   | 2   | 3    | 4   | 5   | 6  | 7   | 8   | 9    | 10 | 11  | 12 | 13     | 14 | 15  | 16   | 17  | 18   | 19 |
|-------------------------------------------------|-----|-----|------|-----|-----|----|-----|-----|------|----|-----|----|--------|----|-----|------|-----|------|----|
| The seminiferous stage of the surrounding areas | XII | XII | XII  | XII | XII | I  | XII | XII | XII  | I  | XII | V  | VI     | V  | XII | XII  | XII | XII  | V  |
| The seminiferous stage of the mismatched areas  | IX  | IX  | VIII | IX  | IX  | IX | IX  | IX  | VIII | IX | IX  | I  | II/III | I  | IX  | VIII | IX  | VIII | I  |

The summary of the stage mismatches observed in the testes of tamoxifen-injected *Bmi1<sup>creER/+</sup>/Rosa26<sup>loxp-stop-loxp-DTA/+</sup>* mice (Figures 3d and 3e), in which *Bmi1<sup>High</sup>*-positive cells were deleted. Seminiferous stages of the surrounding and mismatched areas are shown. Roman numbers indicate seminiferous epithelial stages.

<Figure S1>

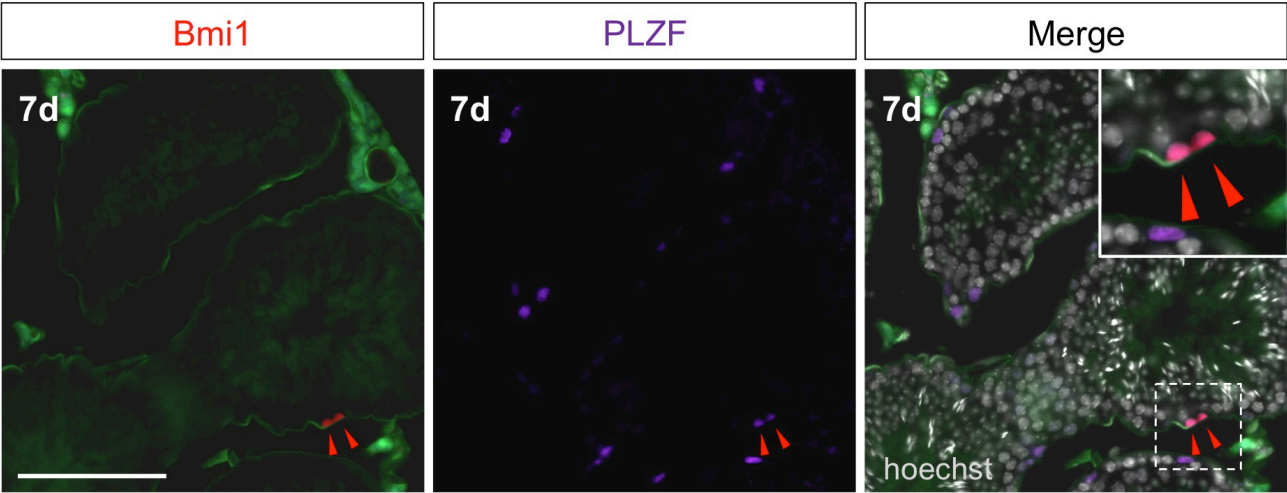

<Figure S2>

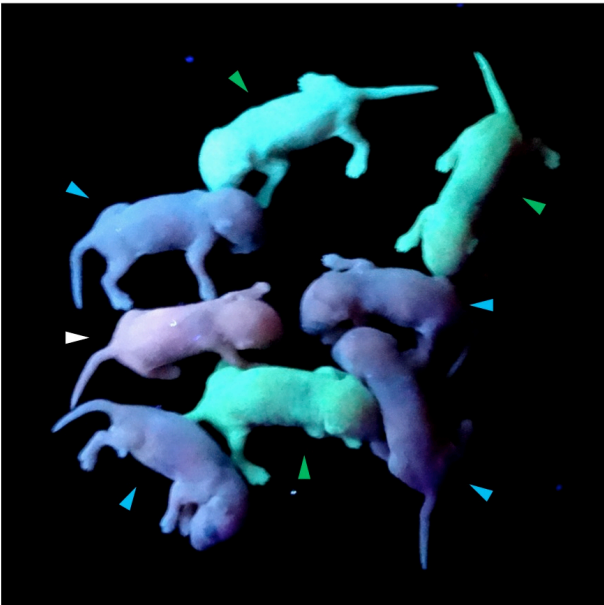



<Figure S3>

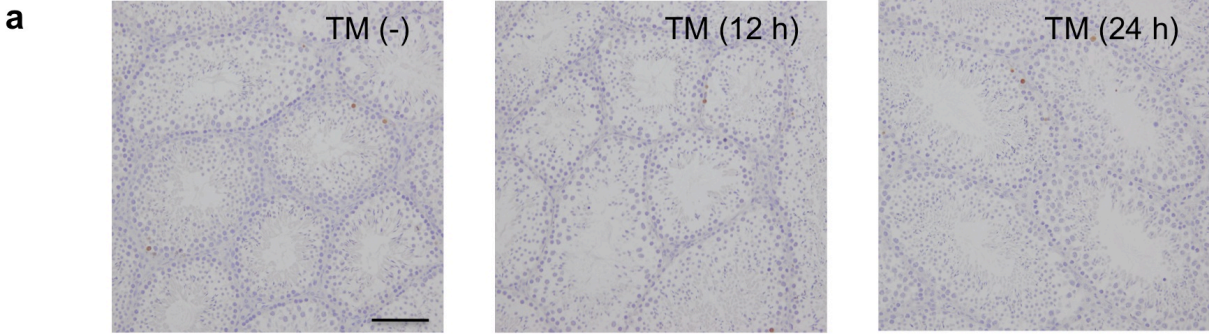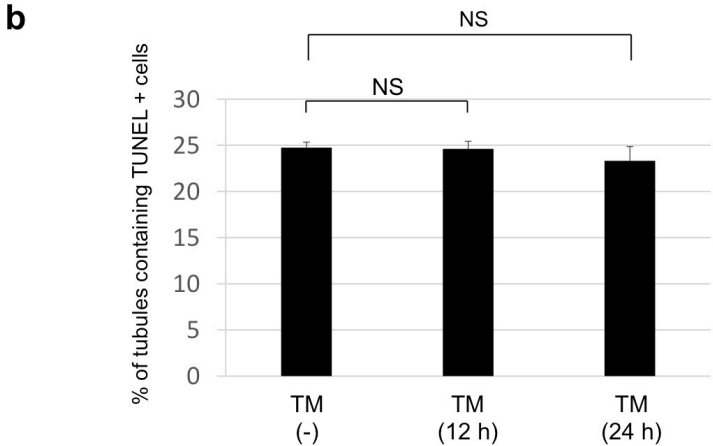

<Figure S4>

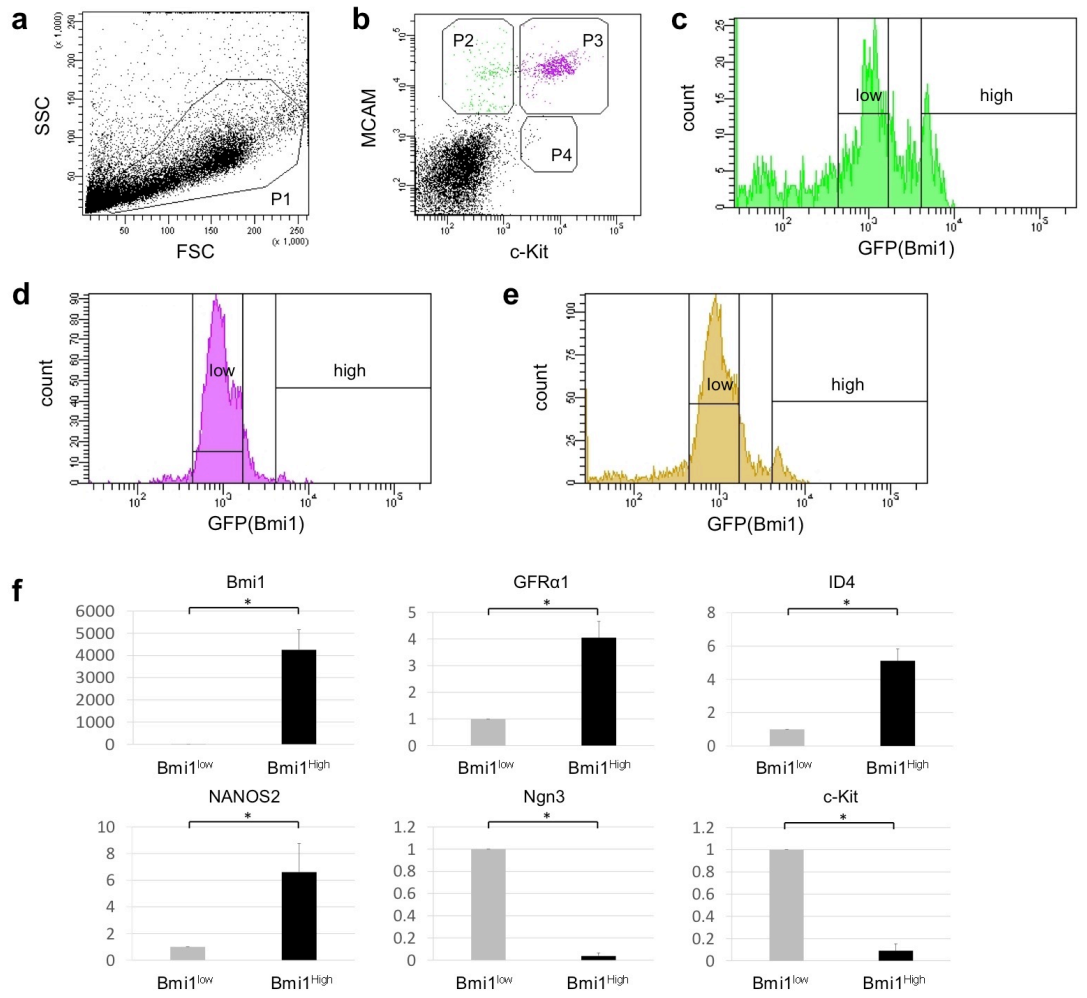

<Figure S5>

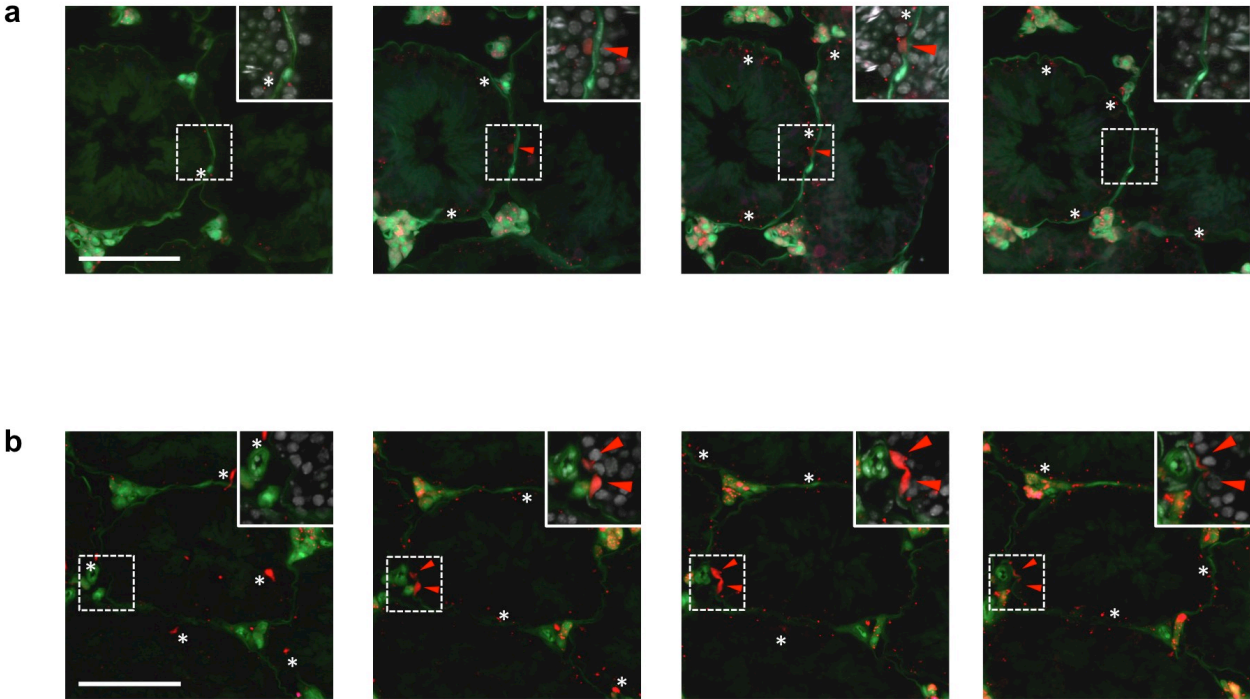

<Figure S6>

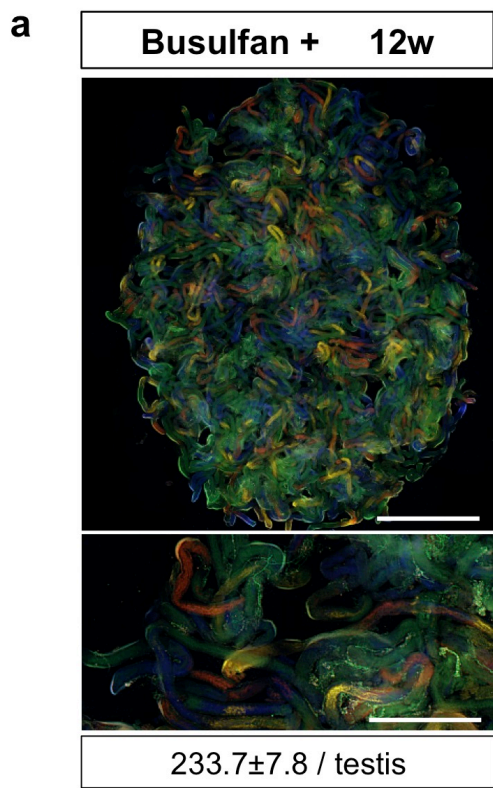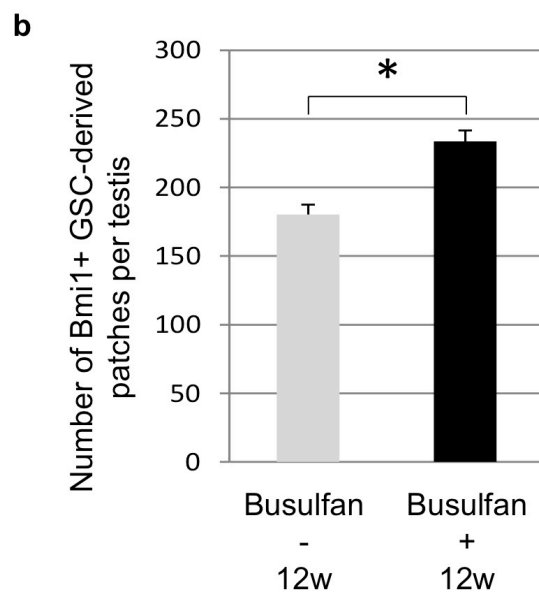

<Figure S7>

| days           | 1  | 2        | 3  | 4        | 5  | 6   | 7    | 8   | 9    |    |     |
|----------------|----|----------|----|----------|----|-----|------|-----|------|----|-----|
| delayed stages | I  | II / III | IV | V        | VI | VII | VIII | IX  | X    | XI | XII |
| actual stages  | XI | XII      | I  | II / III | IV | V   | VI   | VII | VIII | IX | X   |

<Figure S8>

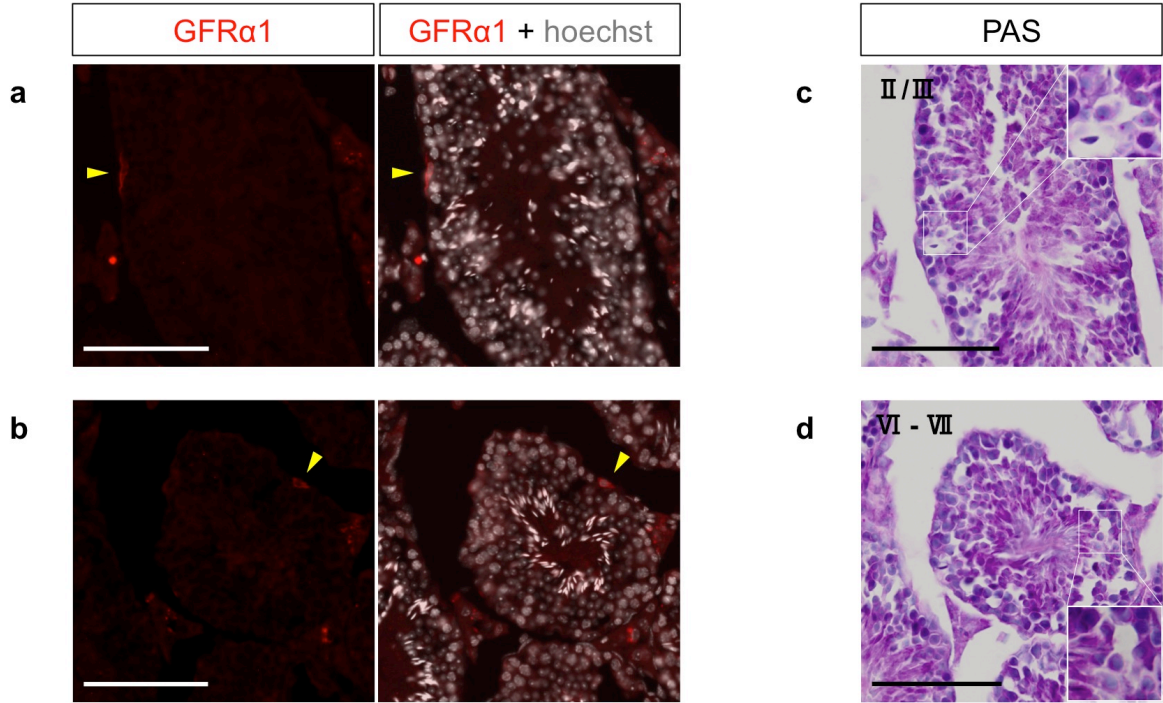

Supplement: srep06175-s1.pdf [file srep06175-s1.pdf]
